# Supplementary material for: Phase Behavior and Role of Organic Additives for Self-Doped CsPbI3 Perovskite Semiconductor Thin Films
Source: MDPI journal article supplement (doi:10.3390/mi14081601), 2023-08-14
Supplement: s1 [file s1]

## Supplementary Materials

# Phase Behavior and Role of Organic Additives for Self-Doped CsPbI<sub>3</sub> Perovskite Semiconductor Thin Films

Tamiru Kebede<sup>1,2</sup>, Mulualem Abebe<sup>1</sup>, Dhakshnamoorthy Mani<sup>1</sup>, Jibin Kelothe Paduvelan<sup>3</sup>, Lishin Thottathi<sup>4</sup>, Aparna Thankappan<sup>5</sup>, Sabu Thomas<sup>6</sup>, Irfan Anjum Badruddin<sup>7</sup>, Sarfaraz Kamangar<sup>7</sup>, Abdul Saddique Shaik<sup>7</sup>, Fekadu Gochole Aga<sup>8,9</sup> and Jung Yong Kim<sup>8,9,\*</sup>

<sup>1</sup> Faculty of Materials Science and Engineering, Jimma Institute of Technology, Jimma University, Jimma P.O. Box 378, Ethiopia; tamiruks@gmail.com (T.K.); mulualem.mekonnen@ju.edu.et (M.A.); dhakshnamoorthy.mani@ju.edu.et (D.M.)

<sup>2</sup> Department of Physics, College of Natural and Computational Science, Bonga University, Bonga P.O. Box 334, Ethiopia

<sup>3</sup> School of Chemical Sciences, Mahatma Gandhi University, Kottayam 686560, India; jibinkp999@gmail.com

<sup>4</sup> Department of Physics and Mathematics, Università Cattolica del Sacro Cuore, Via della Garzetta, 48, 25133 Brescia BS, Italy; lishint123@gmail.com

<sup>5</sup> Department of Physics, Baselius College, Kottayam 686001, India; aparnathankappan@baselius.ac.in

<sup>6</sup> School of Energy Materials, Mahatma Gandhi University, Kottayam 686560, India; sabuthomas@mgu.ac.in

<sup>7</sup> Mechanical Engineering Department, College of Engineering, King Khalid University, Abha 61421, Saudi Arabia; sarfaraz.kamangar@gmail.com (S.K.); abdul.siddique1976@gmail.com (A.S.S.); magami.irfan@gmail.com (I.A.B.)

<sup>8</sup> Department of Materials Science and Engineering, Adama Science and Technology University, Adama P.O. Box 1888, Ethiopia; fekadu.gochole@astu.edu.et

<sup>9</sup> Center of Advanced Materials Science and Engineering, Adama Science and Technology University, Adama P.O. Box 1888, Ethiopia

\* Correspondence: jungyong.kim@astu.edu.et

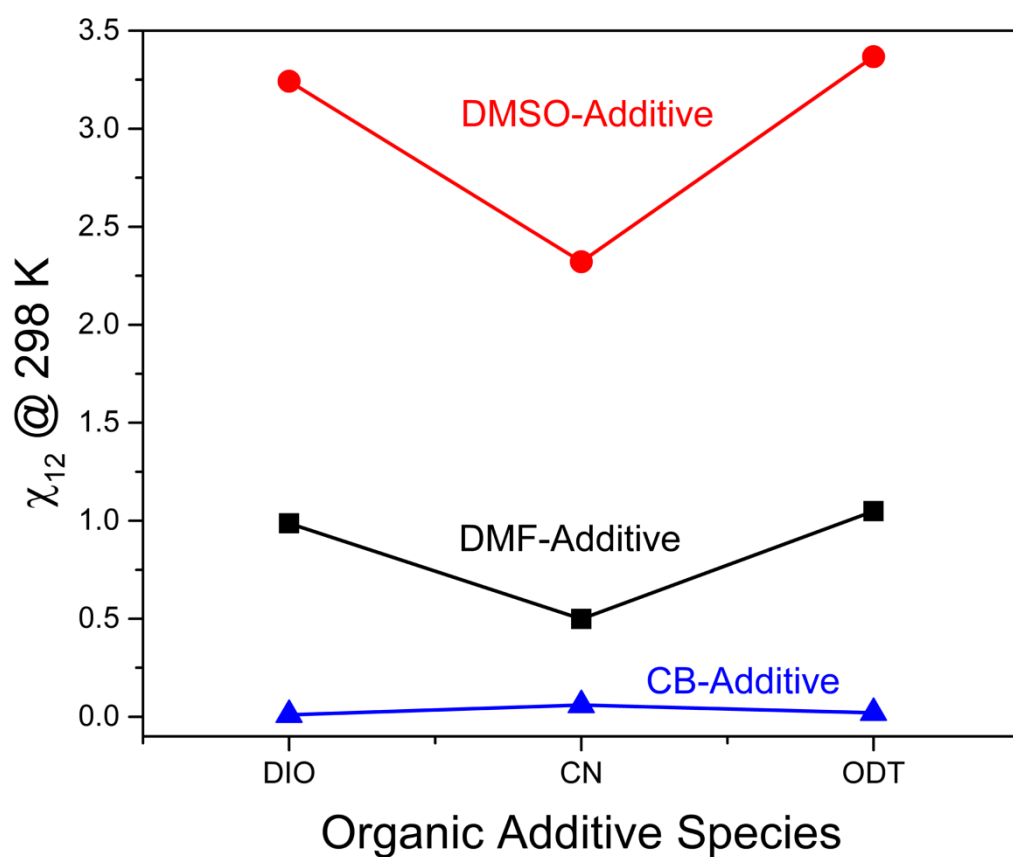

Figure S1. Flory-Huggins interaction parameter at 298 K as a function of organic additive species.

Table S1. Flory-Huggins  $\chi_{12}$  interaction parameter at 298 K as a function of organic additive species.

|             | Binary additive-solvent system |       |       |       |       |       |      |      |      |
|-------------|--------------------------------|-------|-------|-------|-------|-------|------|------|------|
|             | DMF                            |       |       | DMSO  |       |       | CB*  |      |      |
|             | DIO                            | CN    | ODT   | DIO   | CN    | ODT   | DIO  | CN   | ODT  |
| $\chi_{12}$ | 0.987                          | 0.499 | 1.049 | 3.242 | 2.321 | 3.368 | 0.01 | 0.06 | 0.02 |

\* Chlorobenzene (CB) is used as an antisolvent in this study.

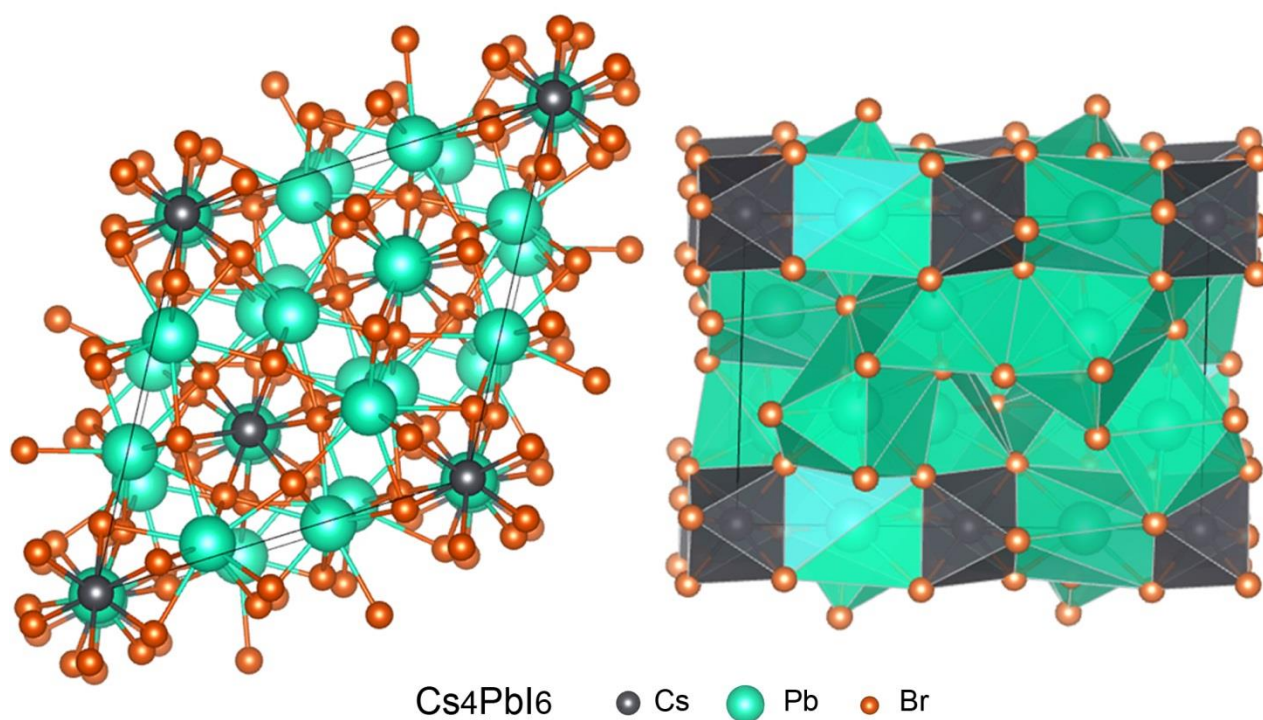

Figure S2. Crystal structure of trigonal Cs<sub>4</sub>PbI<sub>6</sub> with space group R-3c.

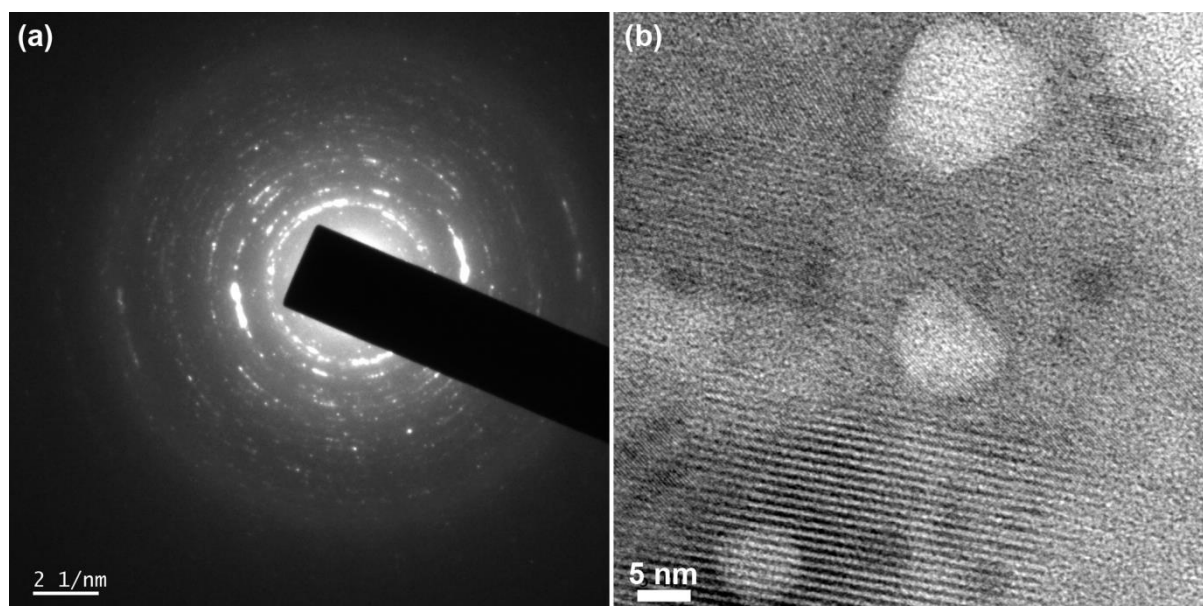

Figure S3. (a) Selected area diffraction pattern and (b) high-resolution TEM images of self-doped CsPbI<sub>3</sub> with the organic additive ODT.

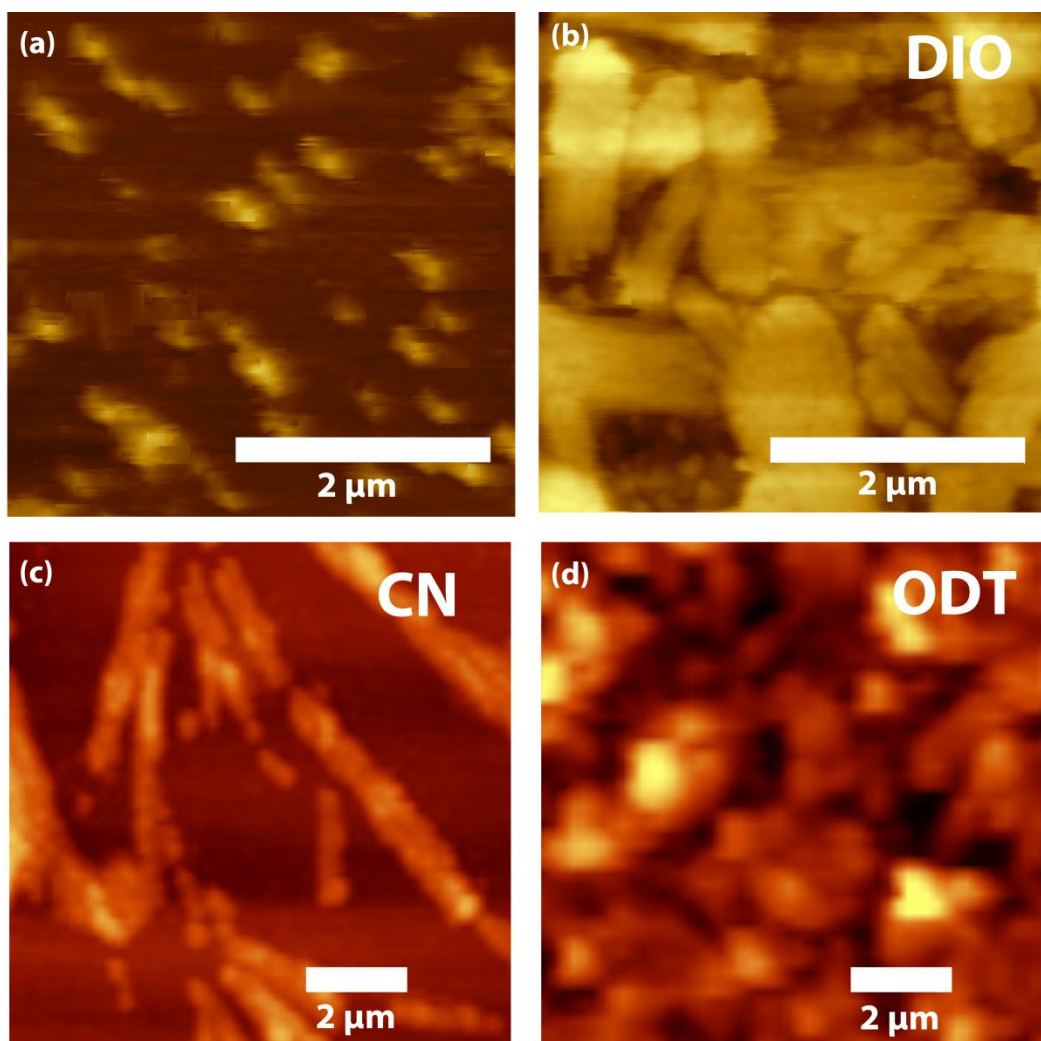

**Figure S4.** AFM tapping-mode height image. (a) Self-doped CsPbI<sub>3</sub> without any additive, (b) self-doped CsPbI<sub>3</sub> with DIO, (c) self-doped CsPbI<sub>3</sub> with CN, and (d) self-doped CsPbI<sub>3</sub> with ODT.
